# Supplementary material for: Eco-Friendly Catalytic Synthesis of Top Value Chemicals from Valorization of Cellulose Waste
Source: MDPI journal article supplement (doi:10.3390/polym15061501), 2023-03-17
Supplement: s1 [file s1]

# **Supplemental Materials**

## **Eco-Friendly catalytic synthesis of Top value chemicals from valorization of cellulose waste**

**Onofrio Losito <sup>1</sup>, Michele Casiello <sup>1</sup>, Caterina Fusco <sup>2</sup>, Helena Mateos Cuadrado <sup>1</sup>, Antonio Monopoli <sup>1</sup>, Angelo Nacci <sup>1,2</sup> and Lucia D'Accolti <sup>1,2,\*</sup>**

<sup>1</sup> Dipartimento di Chimica, Università degli Studi di Bari A. Moro, Via Orabona 4, 70126 Bari, Italy

<sup>2</sup> CNR-Istituto di Chimica dei Composti Organometallici (ICCOM, SS Bari), Via Orabona 4, 70126 Bari, Italy

\* Correspondence: lucia.daccolti@uniba.it

**(18 pages including the cover)**

---

### **Table of Contents**

|                                                                        |             |
|------------------------------------------------------------------------|-------------|
| FTIR-ATR spectra of cigarettes butts and acetylate Newspaper           | p. S2       |
| Supplemental characterization of furfural, HMF, AMF and levulinic acid | pp. S3-S13  |
| Calibration curve for the determination of yields                      | pp. S14-S15 |

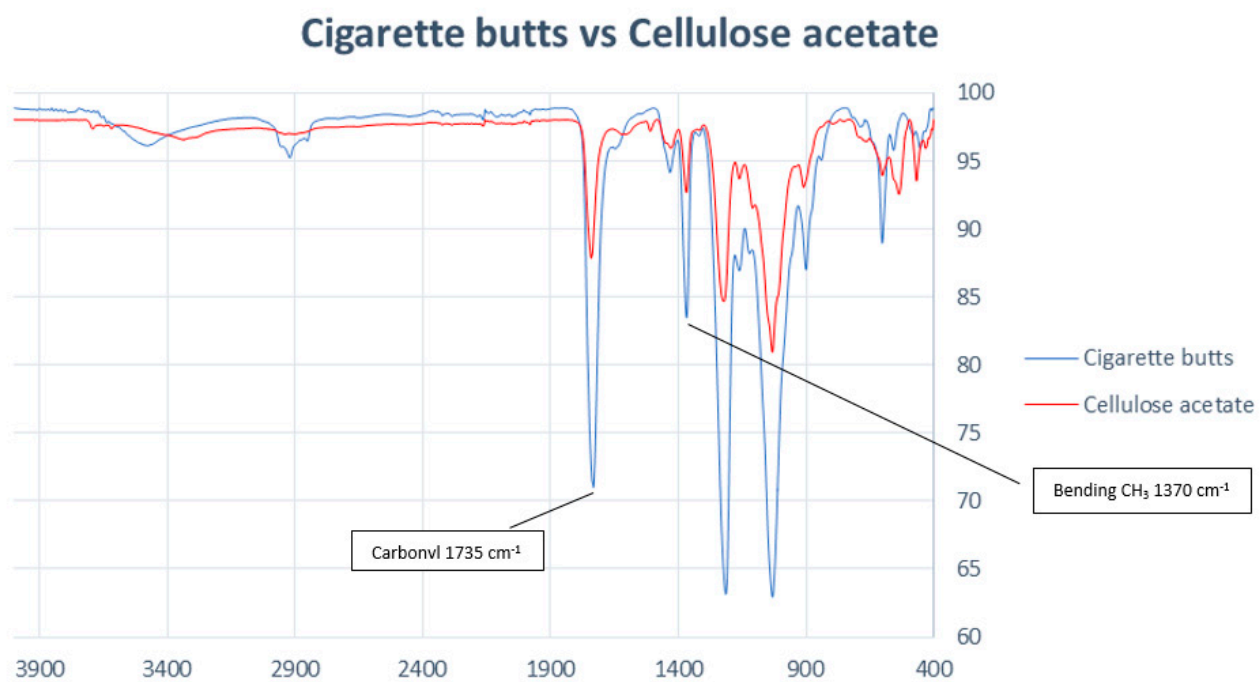

*Figure S1.* FTIR-ATR spectra overlaying of cigarette butts and the reaction product of the acetylation reaction of news paper

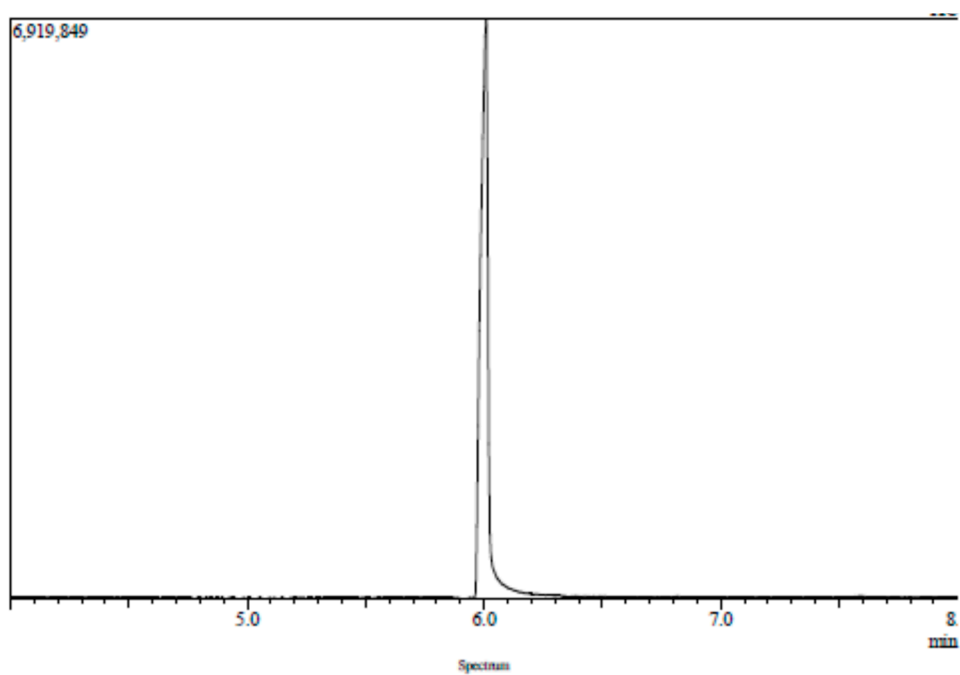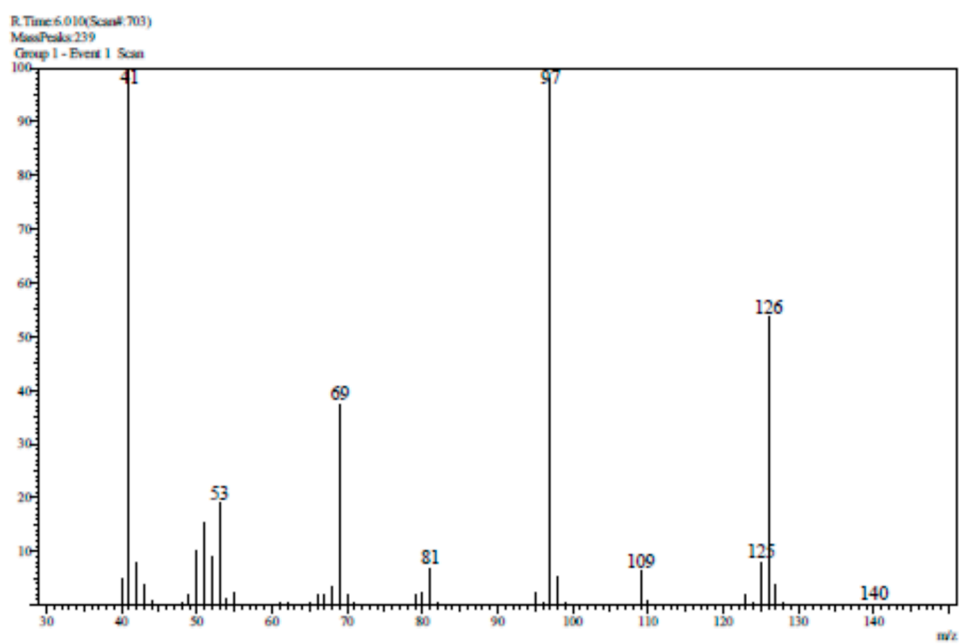

Figure S2. GC/MS analysis of 5-HMF

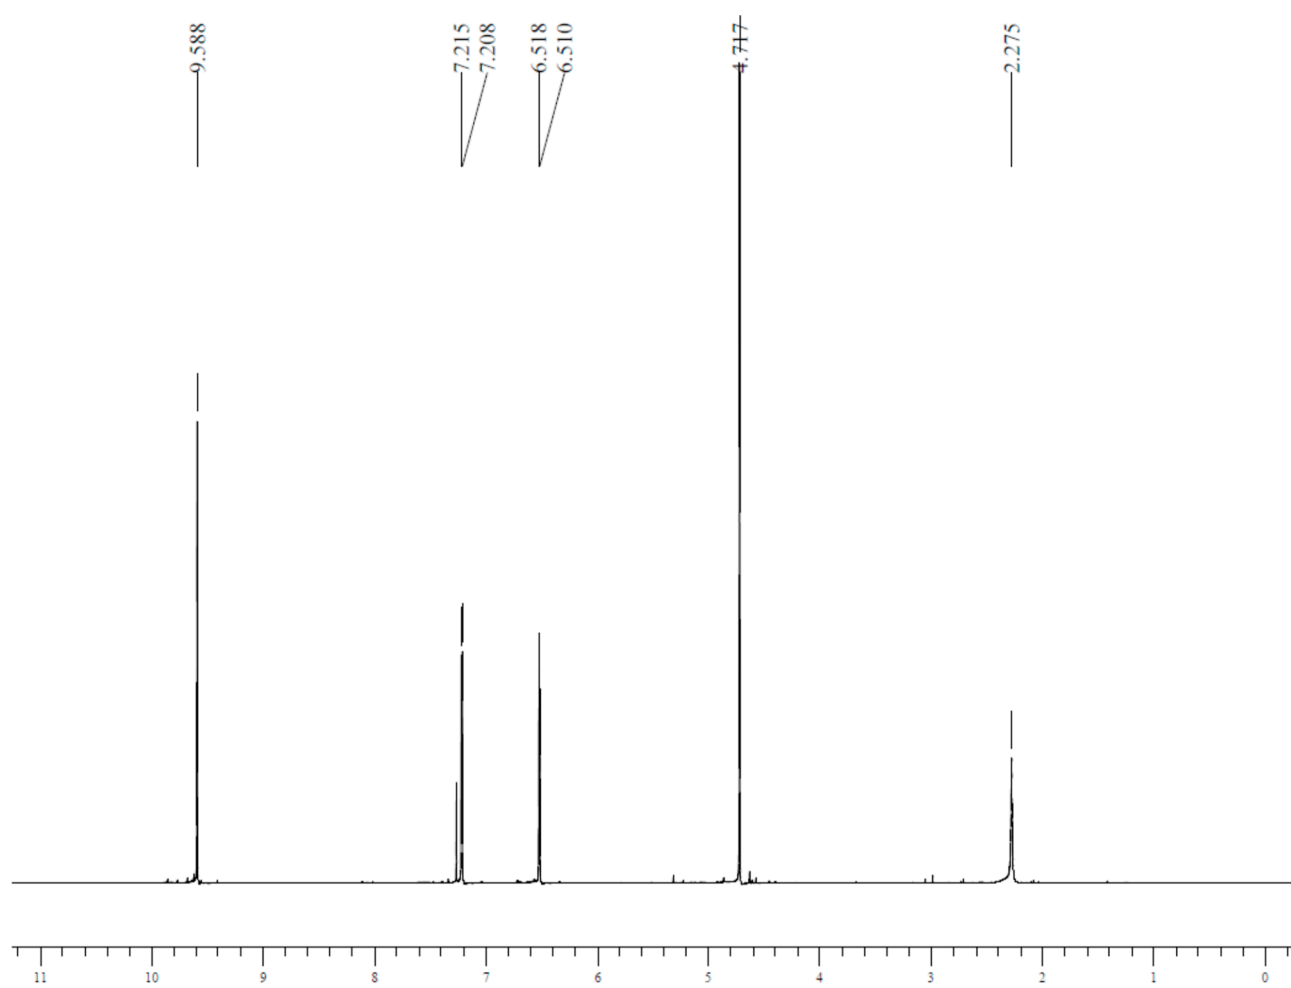

Figure S3.  $^1\text{H}$ -NMR (500 MHz,  $\text{CDCl}_3$ ) of 5-HMF

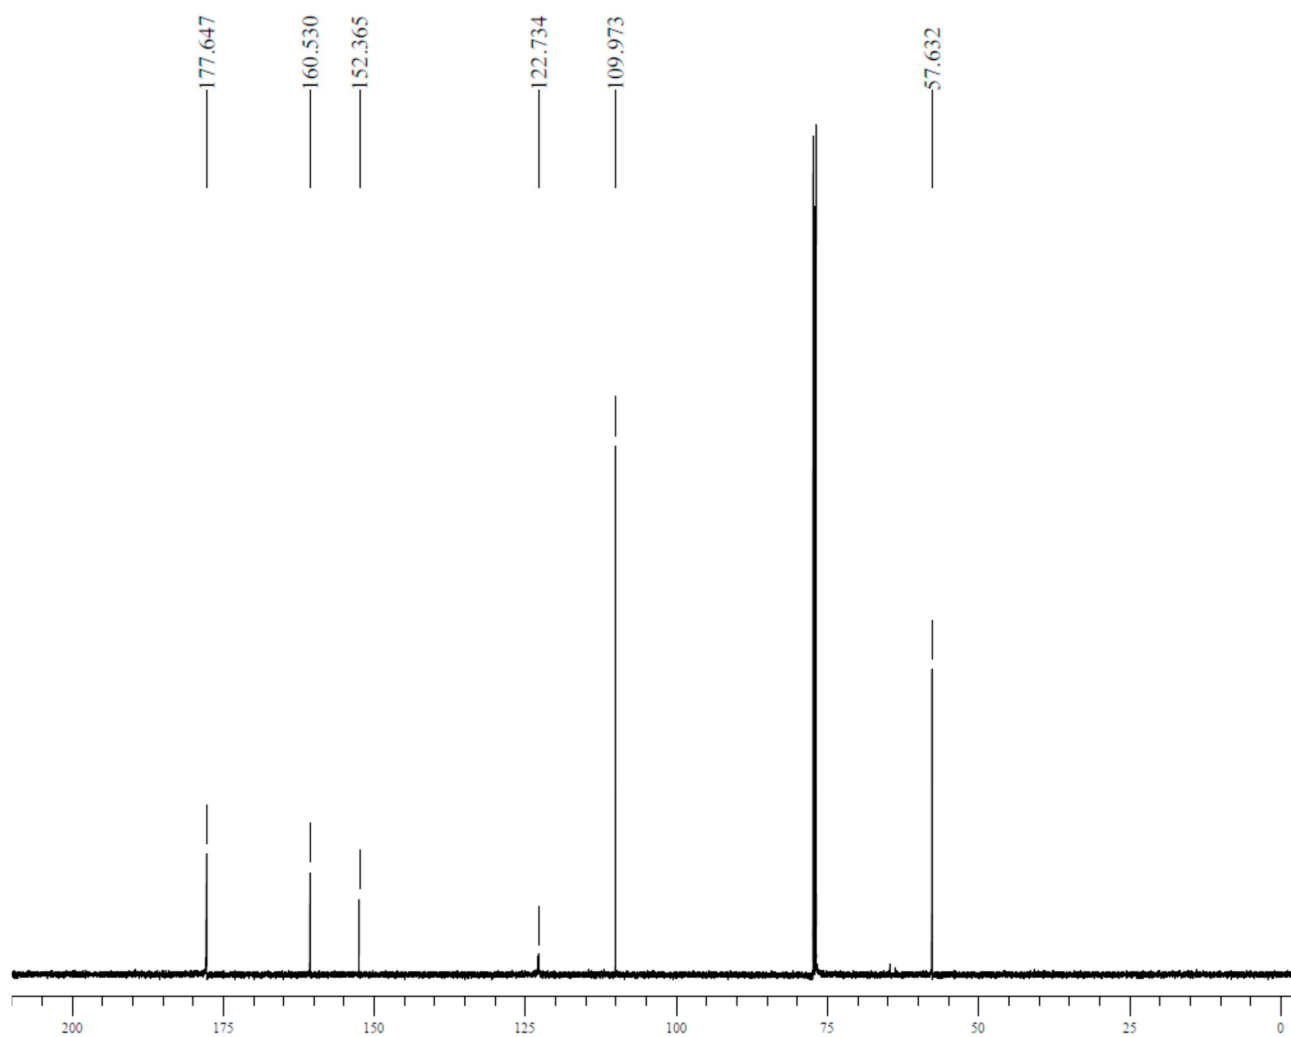

Figure S4. <sup>13</sup>C-NMR (125 MHz, CDCl<sub>3</sub>) of 5-HMF

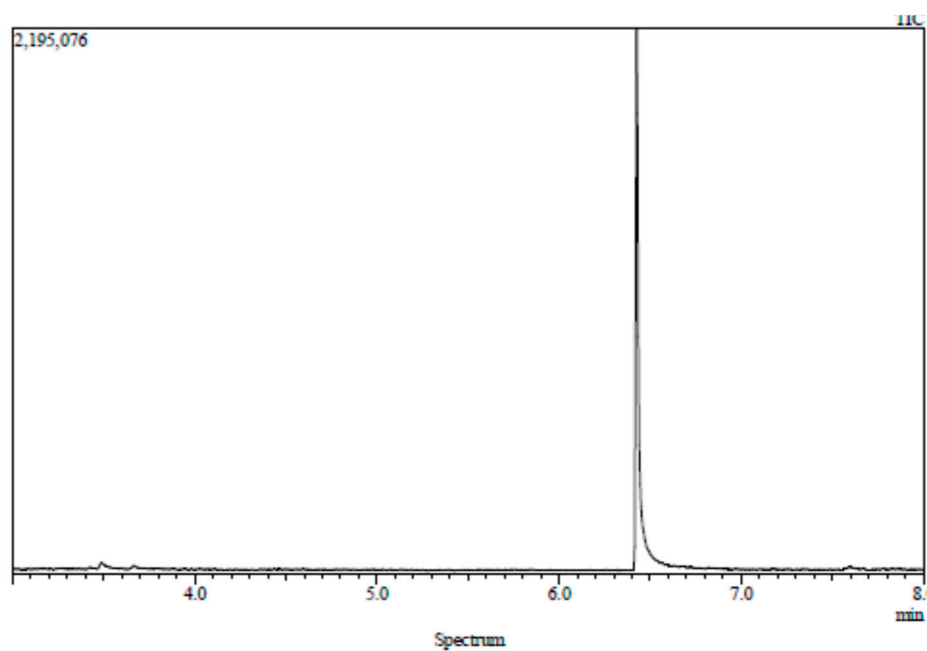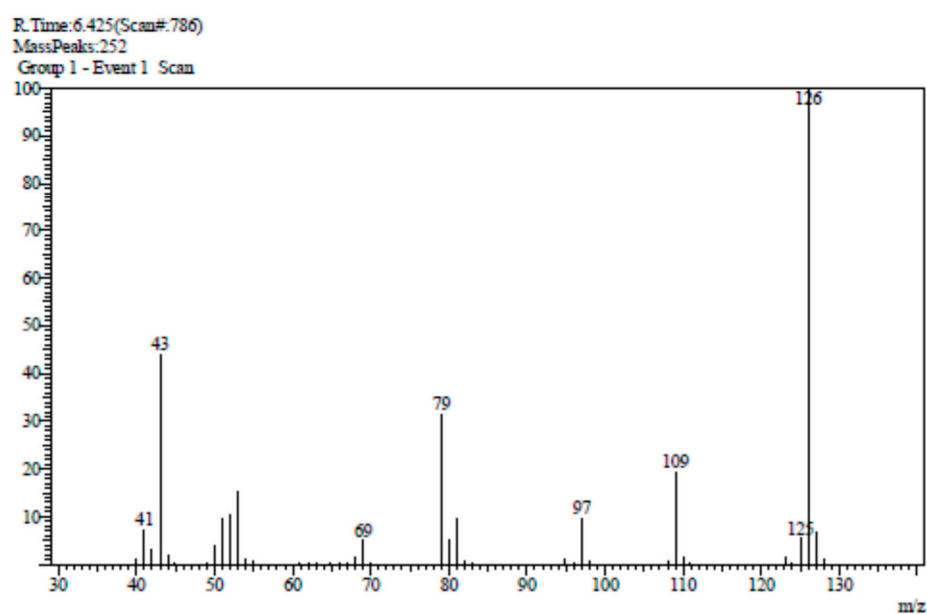

Figure S5. GC/MS analysis of 5-AMF

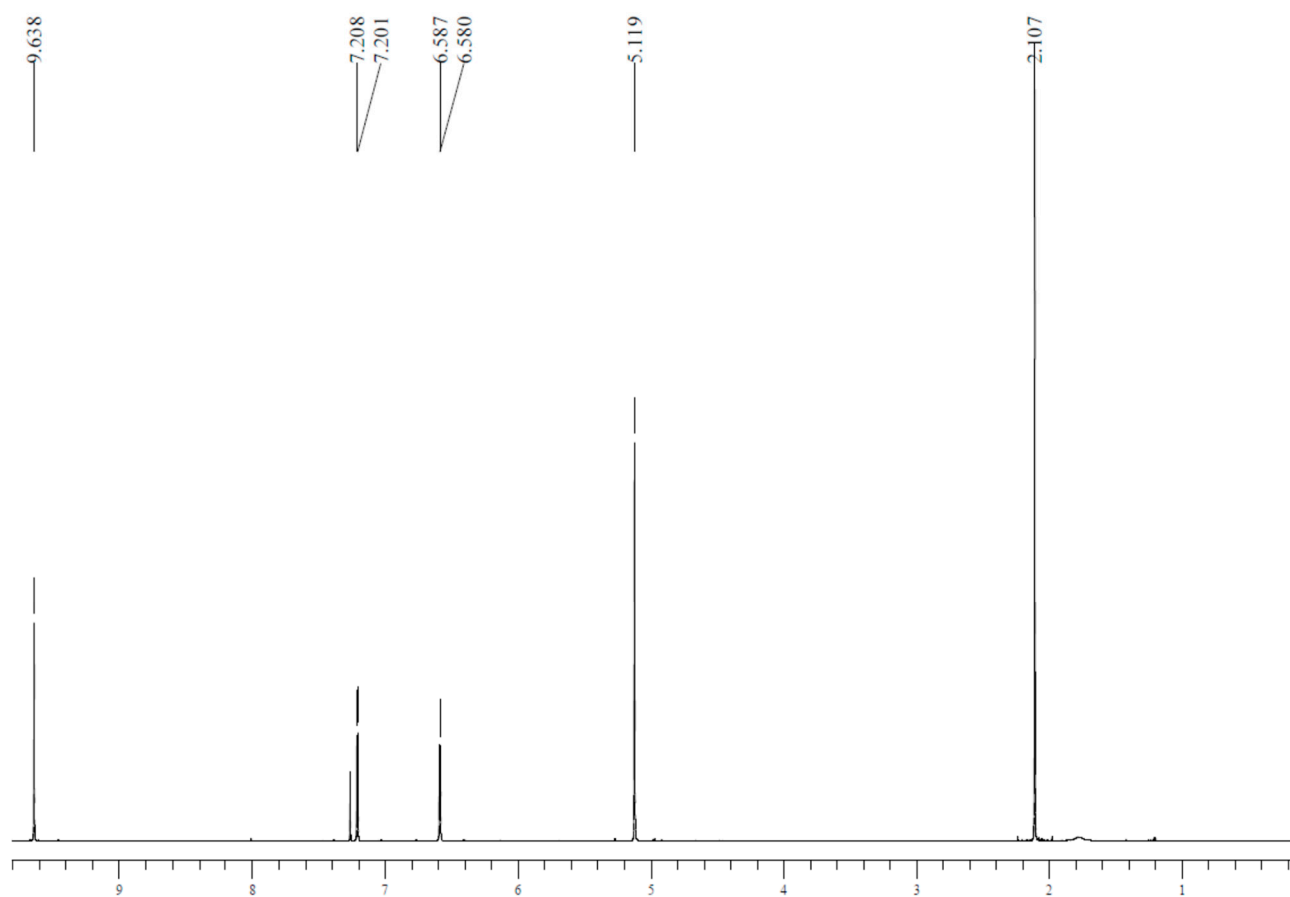

Figure S6.  $^1\text{H}$ -NMR (500 MHz,  $\text{CDCl}_3$ ) of 5-AMF

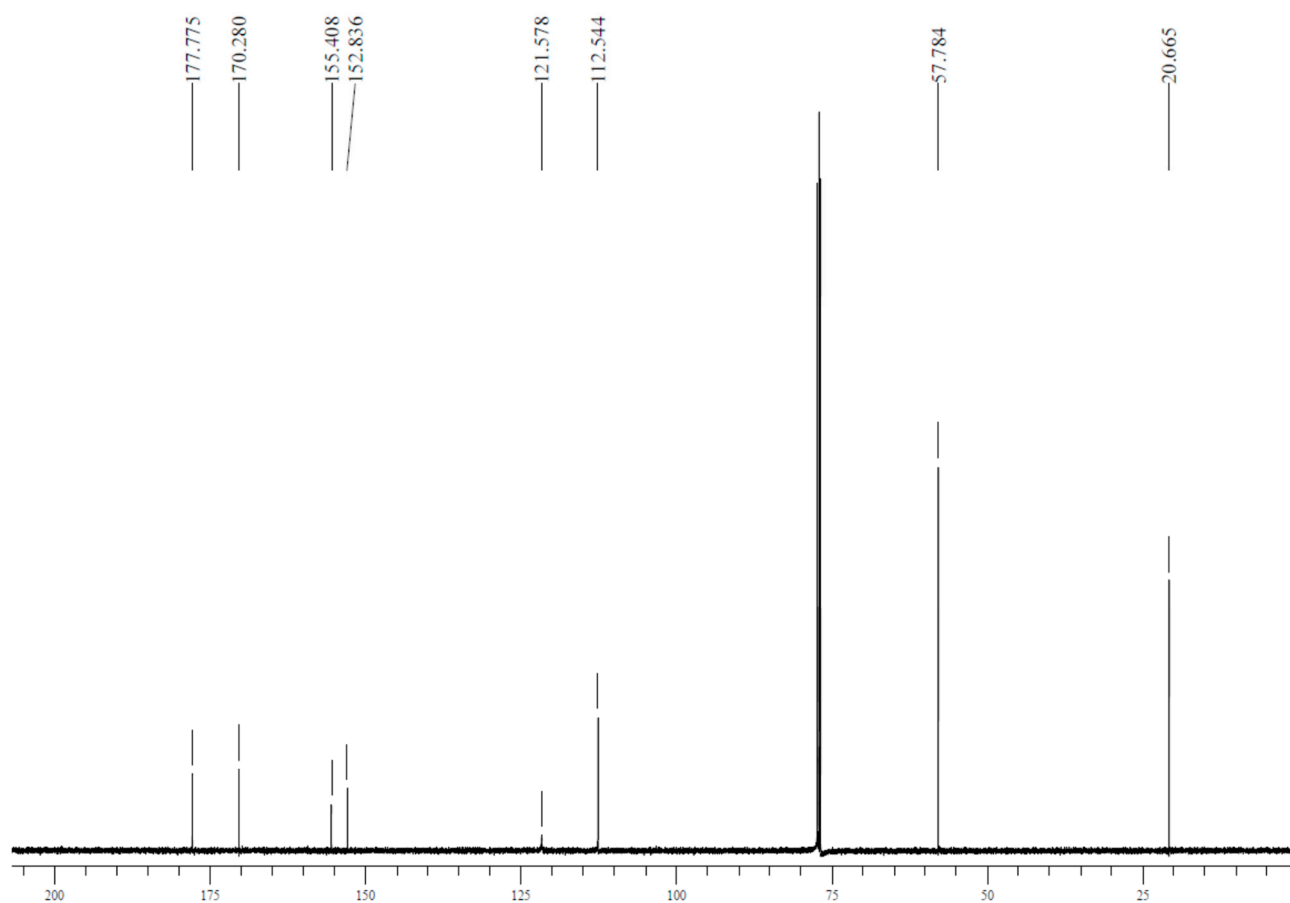

Figure S7. <sup>13</sup>C-NMR (125 MHz, CDCl<sub>3</sub>) of 5-AMF



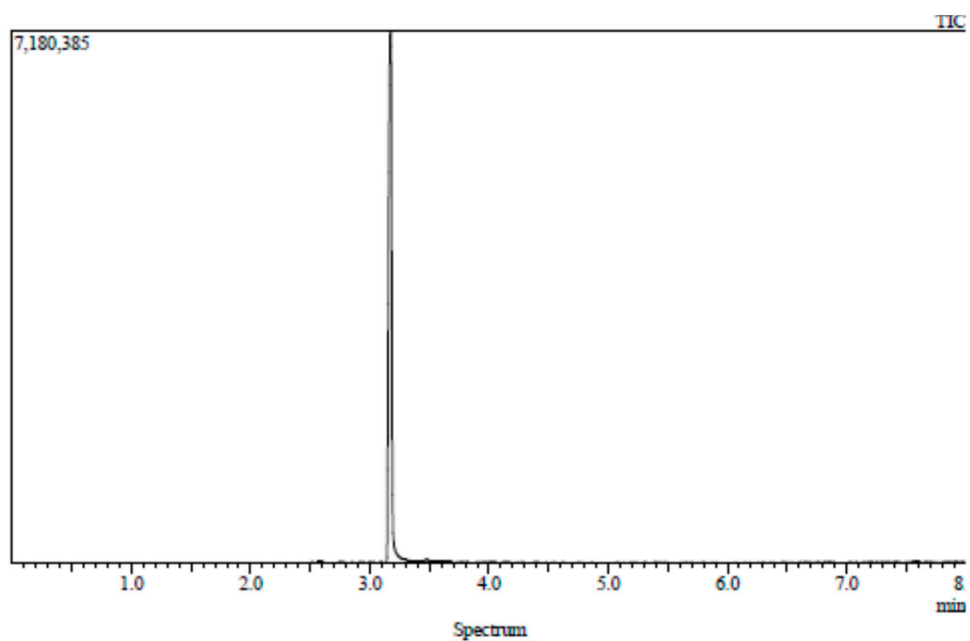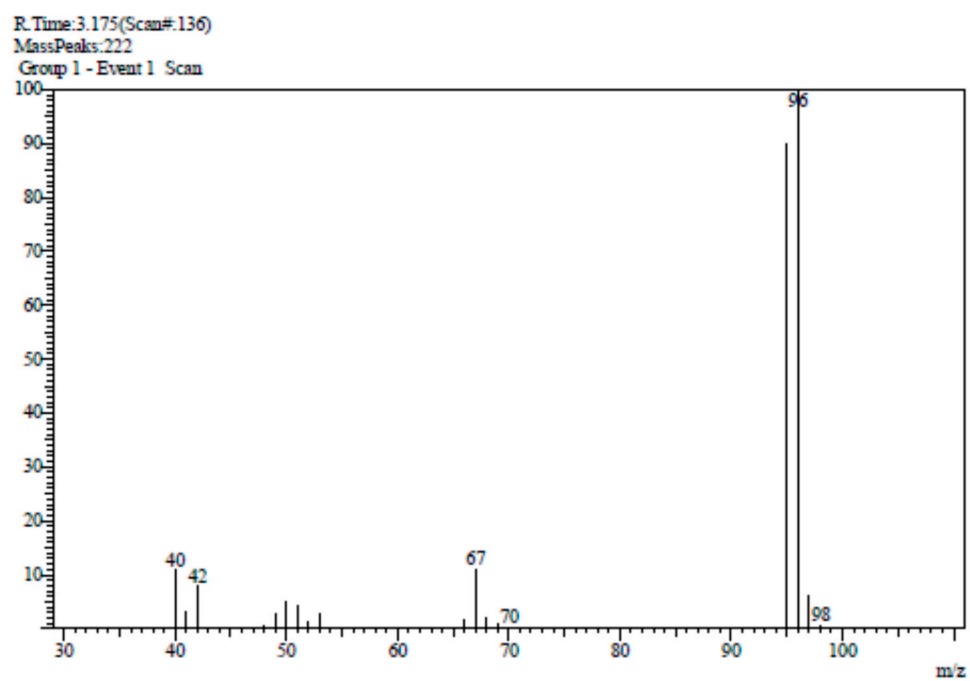

Figure S8. GC/MS of furfural

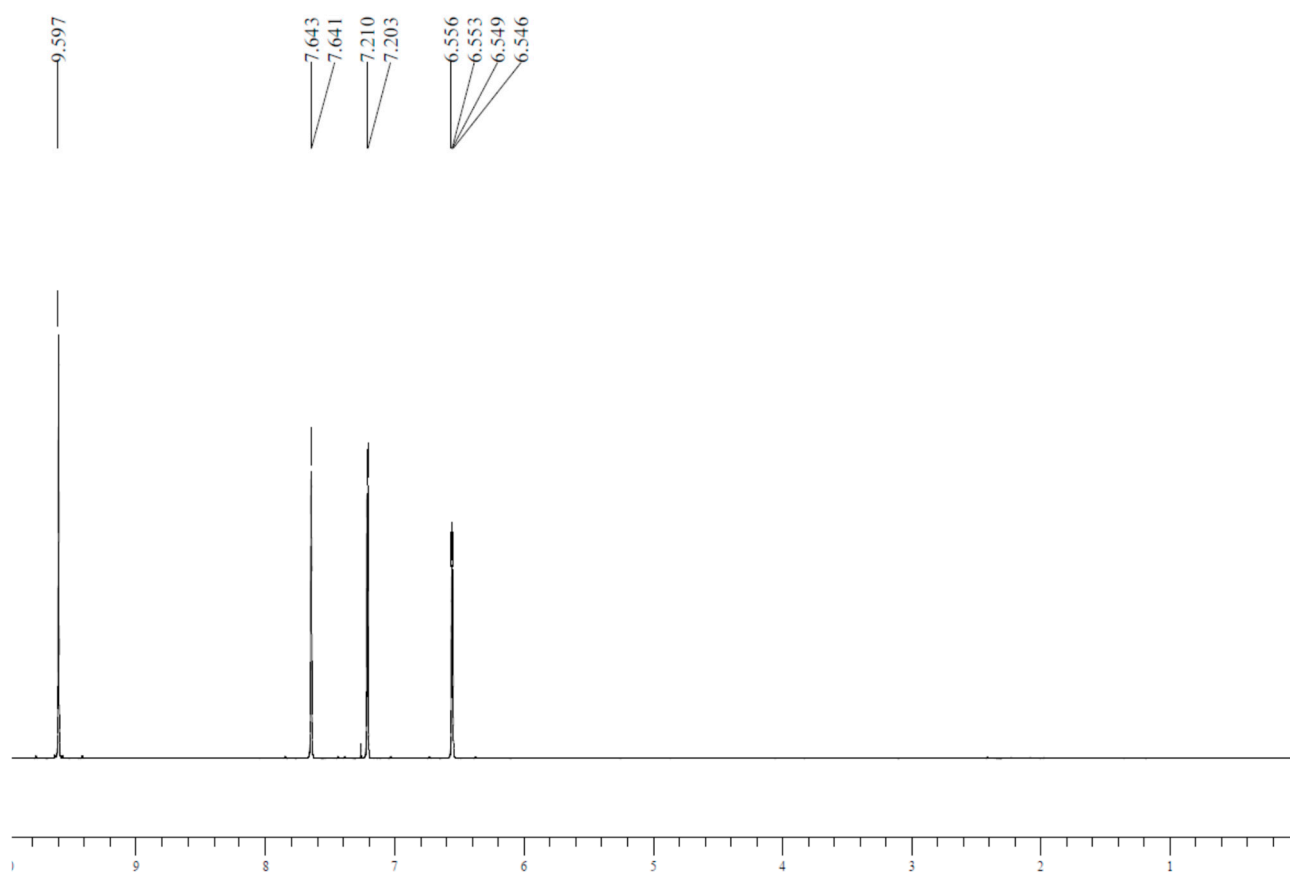

Figure S9.  $^1\text{H}$ -NMR (500 MHz,  $\text{CDCl}_3$ ) of furfural

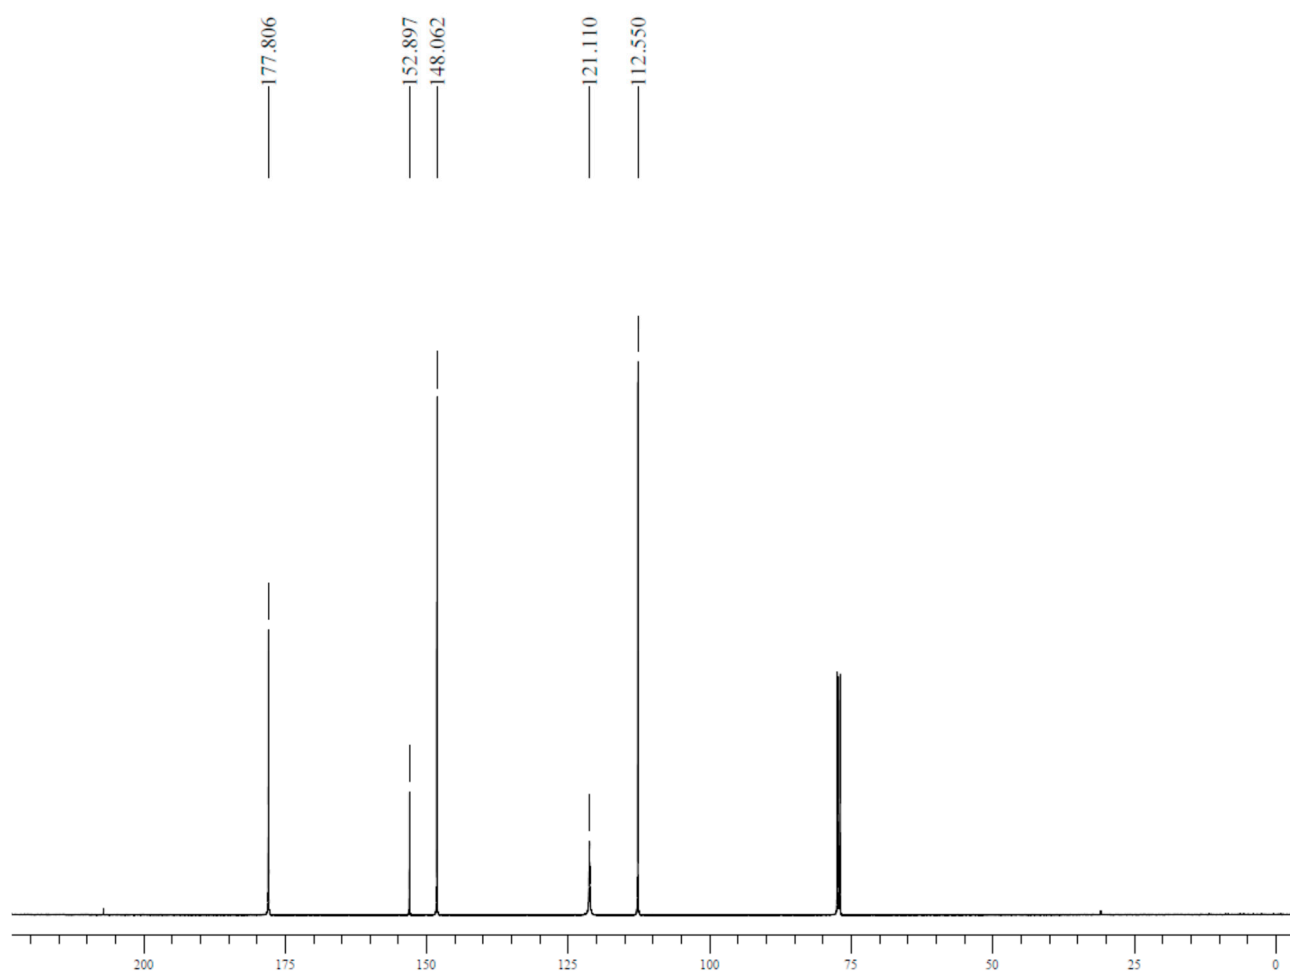

Figure S10. <sup>13</sup>C-NMR (125 MHz, CDCl<sub>3</sub>) of furfural

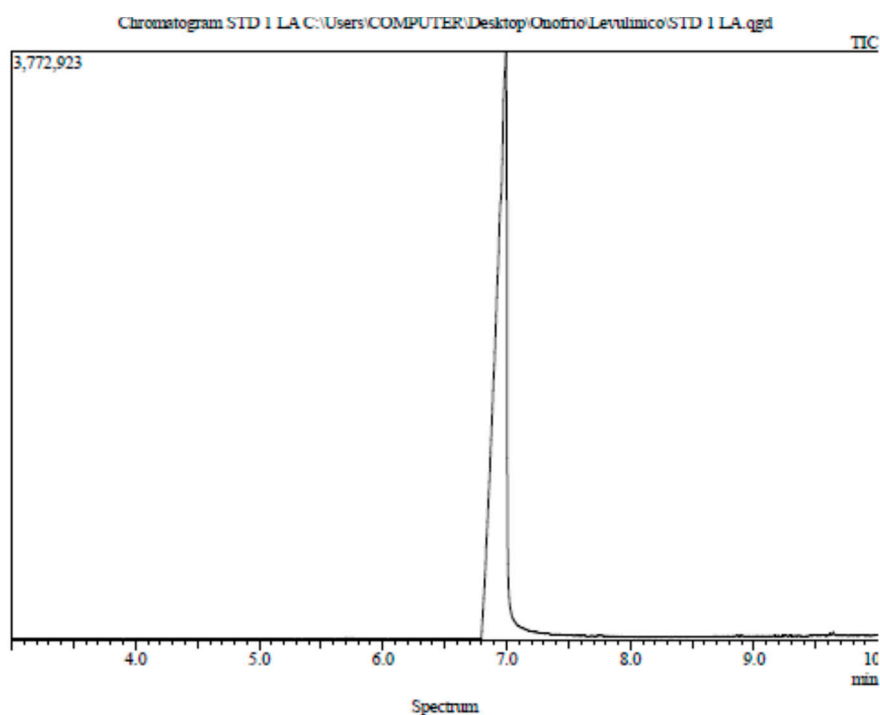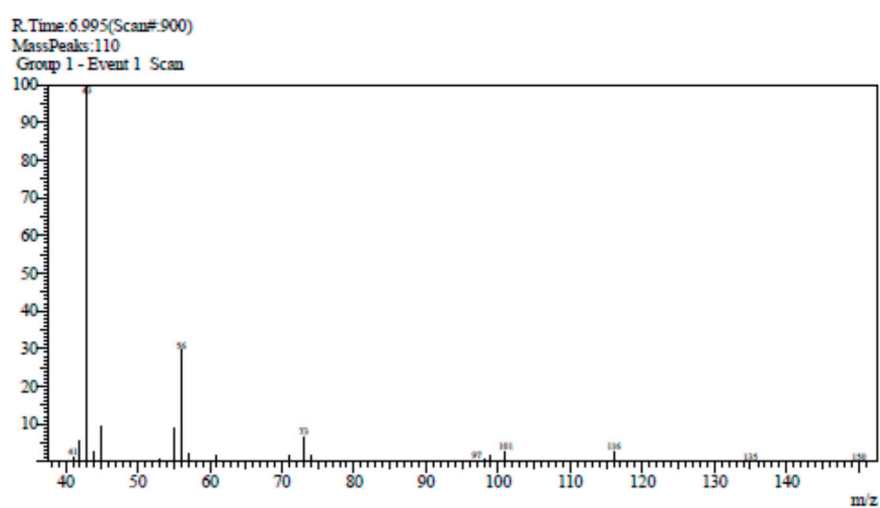

Figure S11. GC/MS of Levulinic Acid

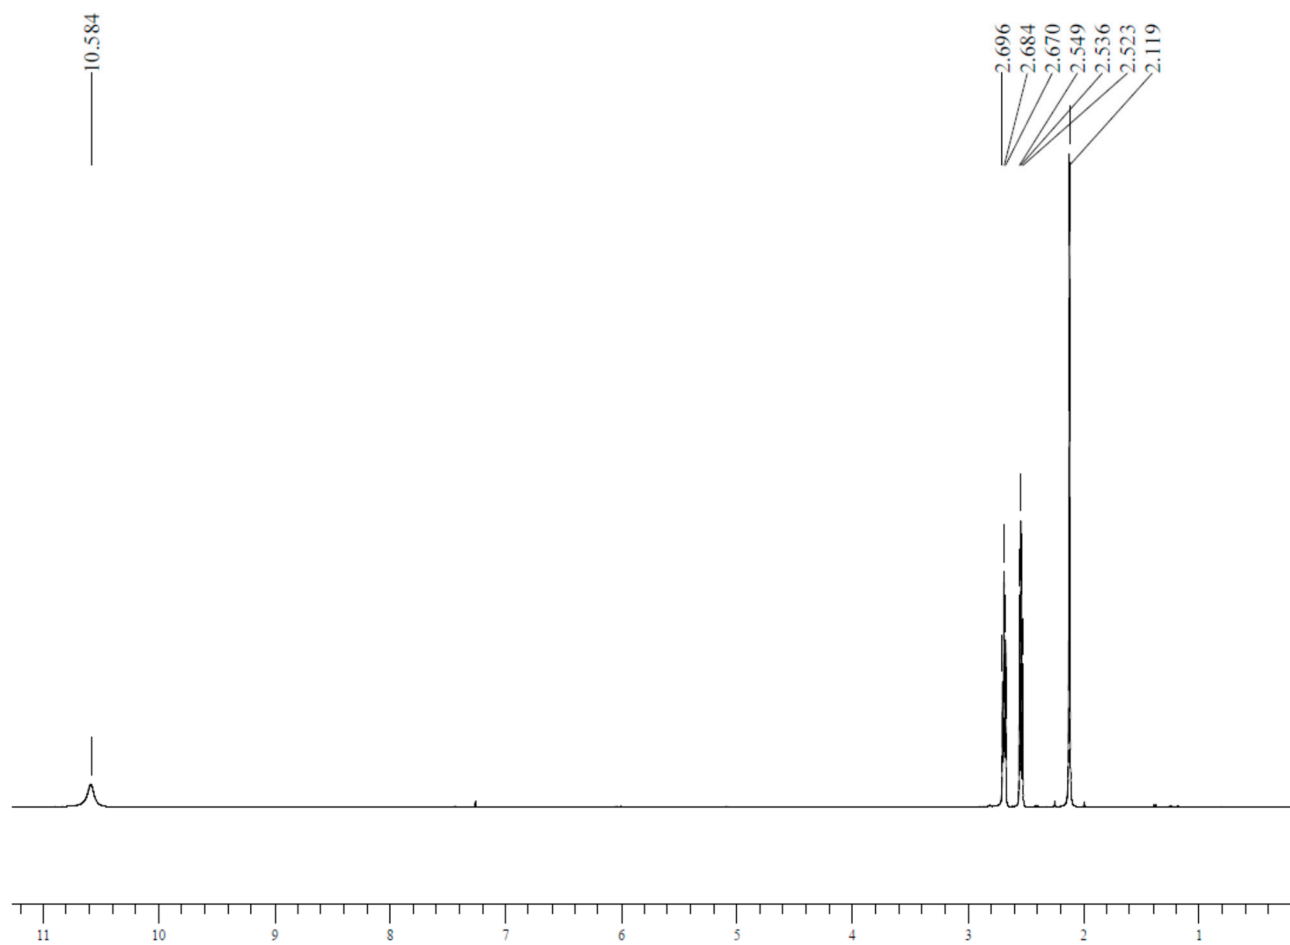

Figure S12.  $^1\text{H}$ -NMR (500 MHz,  $\text{CDCl}_3$ ) of Levulinic acid

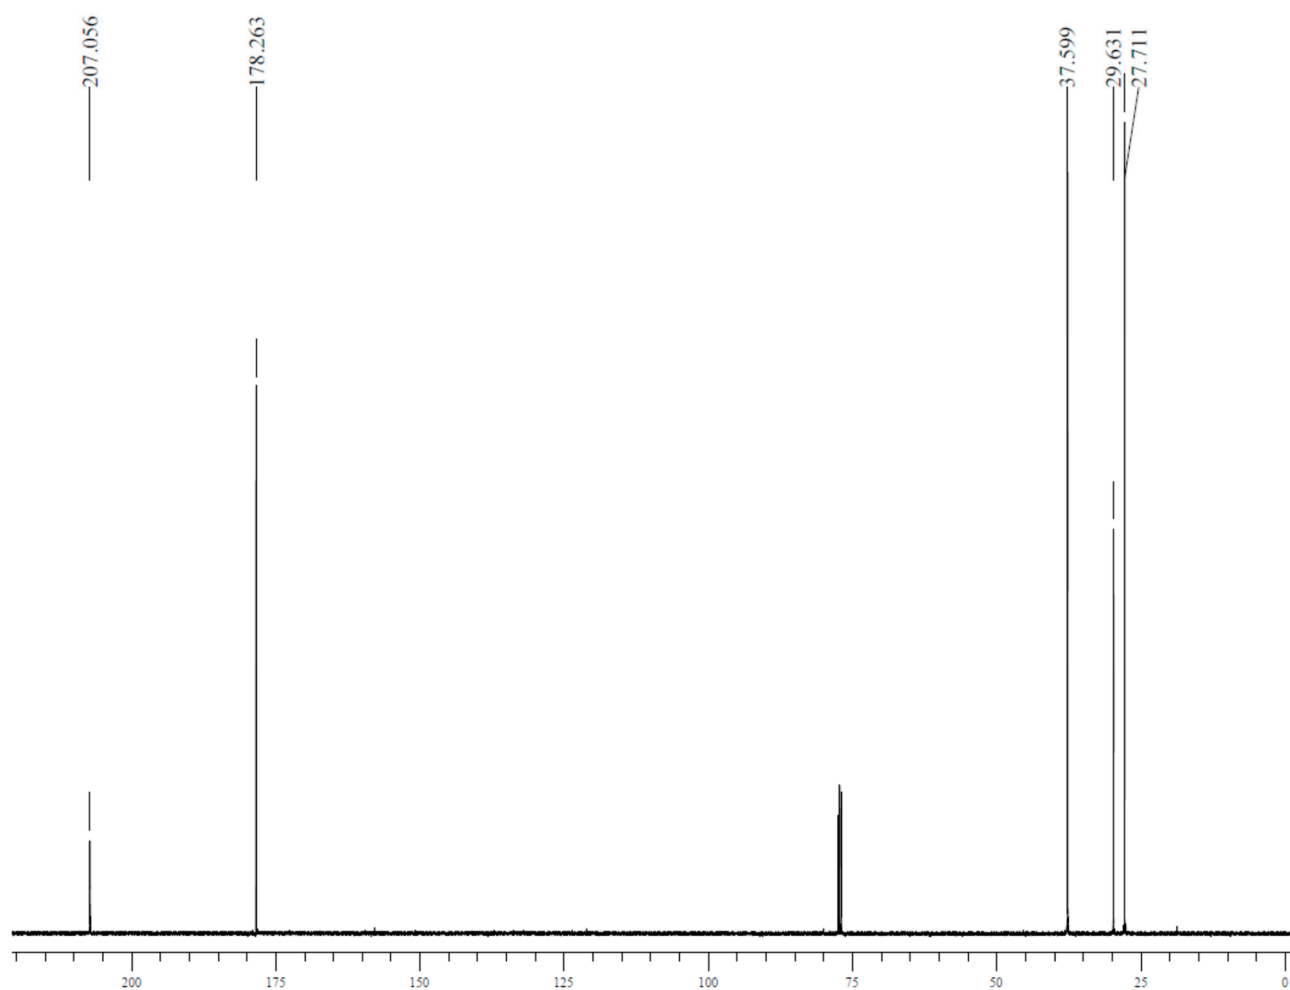

Figure S13. <sup>13</sup>C-NMR (125 MHz, CDCl<sub>3</sub>) of Levulinic acid

### Calibration curve for determination of LA

To evaluate yields of levulinic acid, a calibration curve was prepared by means of 4 standard solutions of pure LA into ethyl acetate at different concentration. GC-MS areas were collected (50.0 °C x 1 min to 150.0 rate 25 °C/min, to 170 °C rate 20 °C/min, to 250 rate 80 °C x 20 min) for each solution by means of three replicates as reported in Figure S14.

| Standard soln. | C (% w/w) | Areas      | SD      |
|----------------|-----------|------------|---------|
| STD #1         | 0.2613    | 3,834,648  | 180,601 |
|                |           | 3,583,892  |         |
|                |           | 3,934,418  |         |
| STD #2         | 0.5195    | 7,493,909  | 250,024 |
|                |           | 7,027,383  |         |
|                |           | 7,104,758  |         |
| STD #3         | 0.7525    | 11,703,311 | 173,357 |
|                |           | 11,589,283 |         |
|                |           | 11,362,738 |         |
| STD #4         | 0.9840    | 15,738,782 | 225,755 |
|                |           | 15,552,728 |         |
|                |           | 15,289,478 |         |

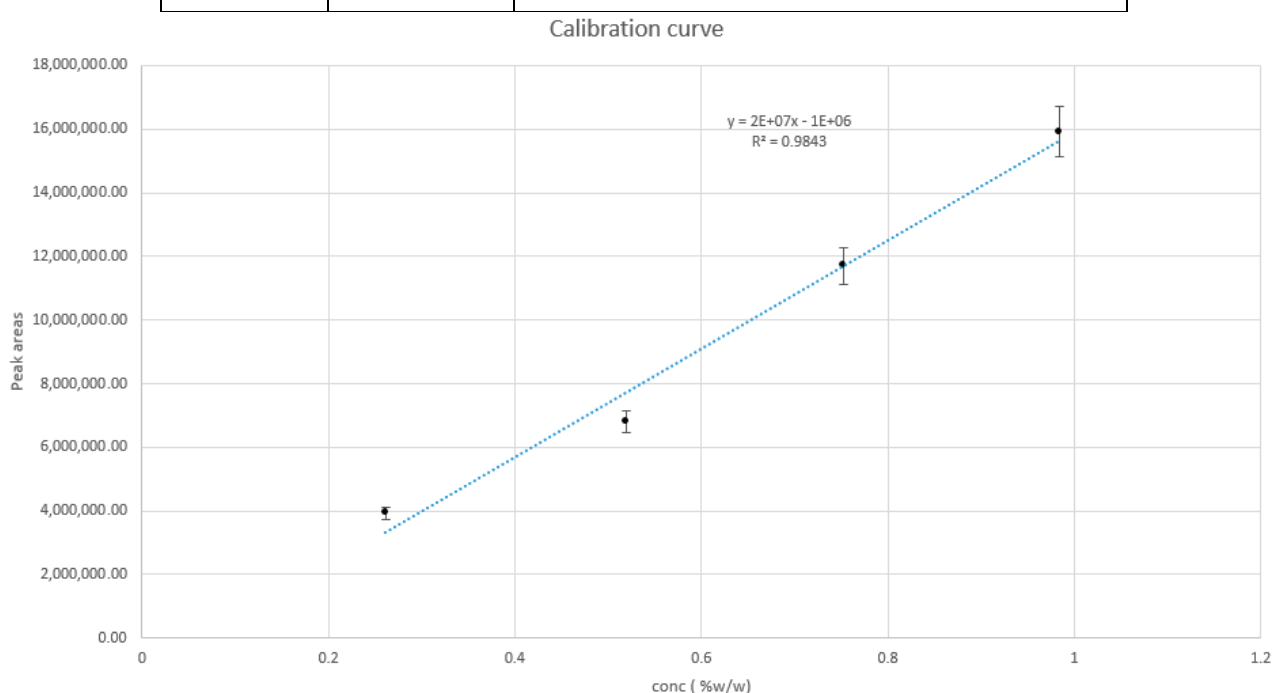

Figure S14. Calibration curve for evaluating yields of Levulinic Acid.

### Calibration curve for determination of 5-AMF,5-HMF and furfural.

To evaluate yields of HMF,AMF and furfural, a calibration curve was prepared by means of 4 standard solutions of pure 5-HMF into ethyl acetate at different concentration. GC-MS areas were collected (50.0 °C x 1 min to 150.0 rate 25 °C/min, to 170 °C rate 20 °C/min, to 250 rate 80 °C x 20 min) for each solution by means of three replicates as reported in Figure S15

| Standard soln. | C (% w/w) | Areas      | SD          |
|----------------|-----------|------------|-------------|
| STD #1         | 0.18      | 5,107,856  | 274,720     |
|                |           | 5,333,207  |             |
|                |           | 4,786,565  |             |
| STD #2         | 0.3737    | 10,753,171 | 926,449     |
|                |           | 12,548,654 |             |
|                |           | 11,254,545 |             |
| STD #3         | 0.64      | 21,002,145 | 597,462     |
|                |           | 21,652,123 |             |
|                |           | 20,458,784 |             |
| STD #4         | 0.8705    | 31,547,874 | 102,000,8.4 |
|                |           | 32,555,875 |             |
|                |           | 33,587,844 |             |



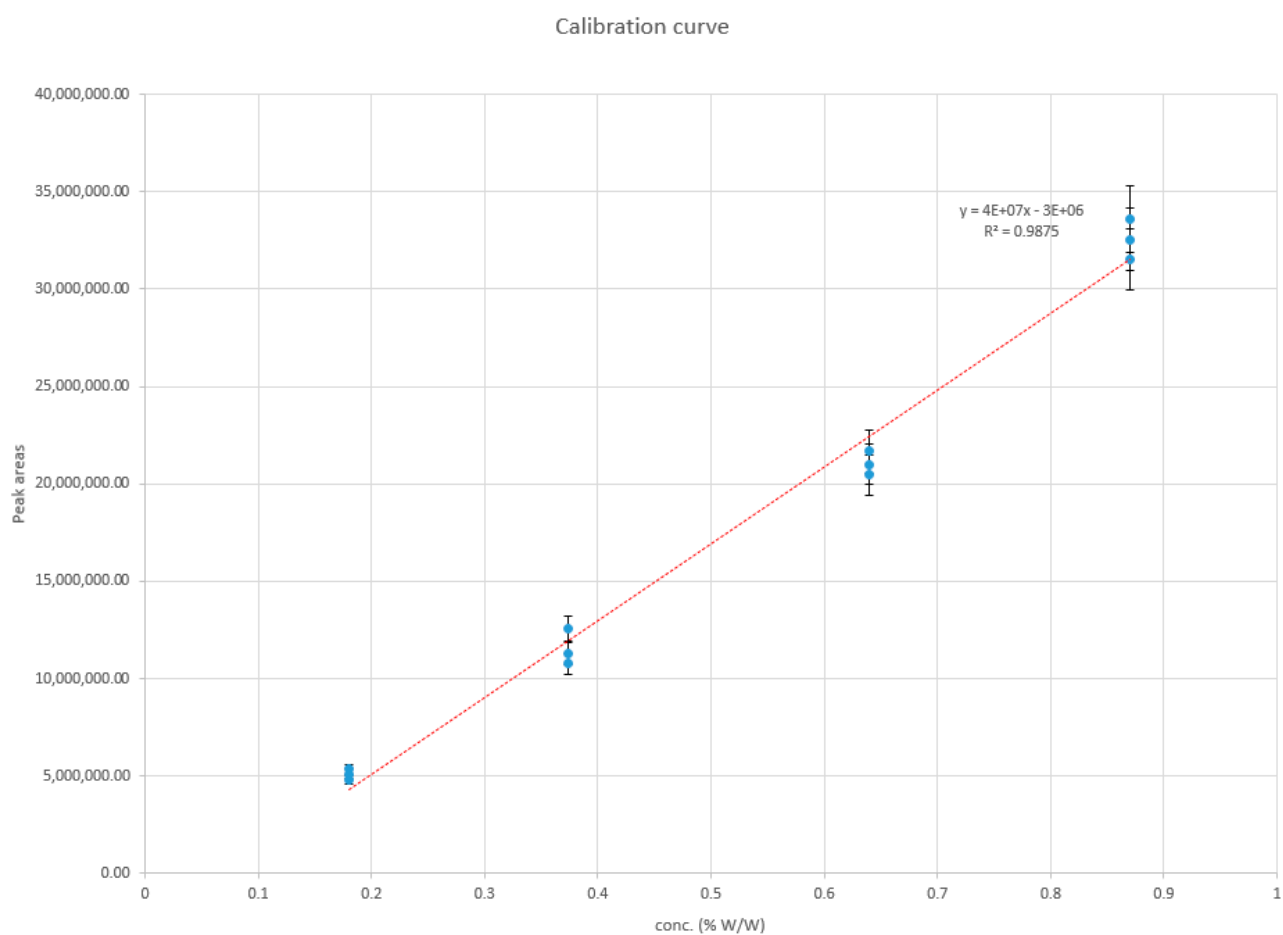

*Figure S15.* Calibration curve for evaluating yields of 5-HMF, furfural and 5-AMF.
